# Supplementary material
Source: MDPI journal article supplement (https://www.mdpi.com/2072-4292/15/16/3958)
Supplement: s1 [file s1]

---

Article

# Land-Use Mapping with Multi-Temporal Sentinel Images Based on Google Earth Engine in Southern Xinjiang Uygur Autonomous Region, China

Riqiang Chen <sup>1,2,3</sup>, Hao Yang <sup>2</sup>, Guijun Yang <sup>2</sup>, Yang Liu <sup>4</sup>, Chengjian Zhang <sup>1,2</sup>, Huiling Long <sup>2</sup>, Haifeng Xu <sup>1</sup>, Yang Meng <sup>2,5</sup> and Haikuan Feng <sup>2,5,\*</sup>

<sup>1</sup> School of Information Science and Technology, Beijing Forestry University, Beijing 100083, China

<sup>2</sup> Key Laboratory of Quantitative Remote Sensing in Agriculture of Ministry of Agriculture and Rural Affairs, Information Technology Research Center, Beijing Academy of Agriculture and Forestry Sciences, Beijing 100097, China

<sup>3</sup> Engineering Research Center for Forestry-Oriented Intelligent Information Processing of National Forestry and Grassland Administration, Beijing 100083, China

<sup>4</sup> Key Lab of Smart Agriculture System, Ministry of Education, China Agricultural University, Beijing 100083, China

<sup>5</sup> College of Agriculture, Nanjing Agricultural University, Nanjing 210095, China

\* Correspondence: fenghk@nercita.org.cn

supplementary

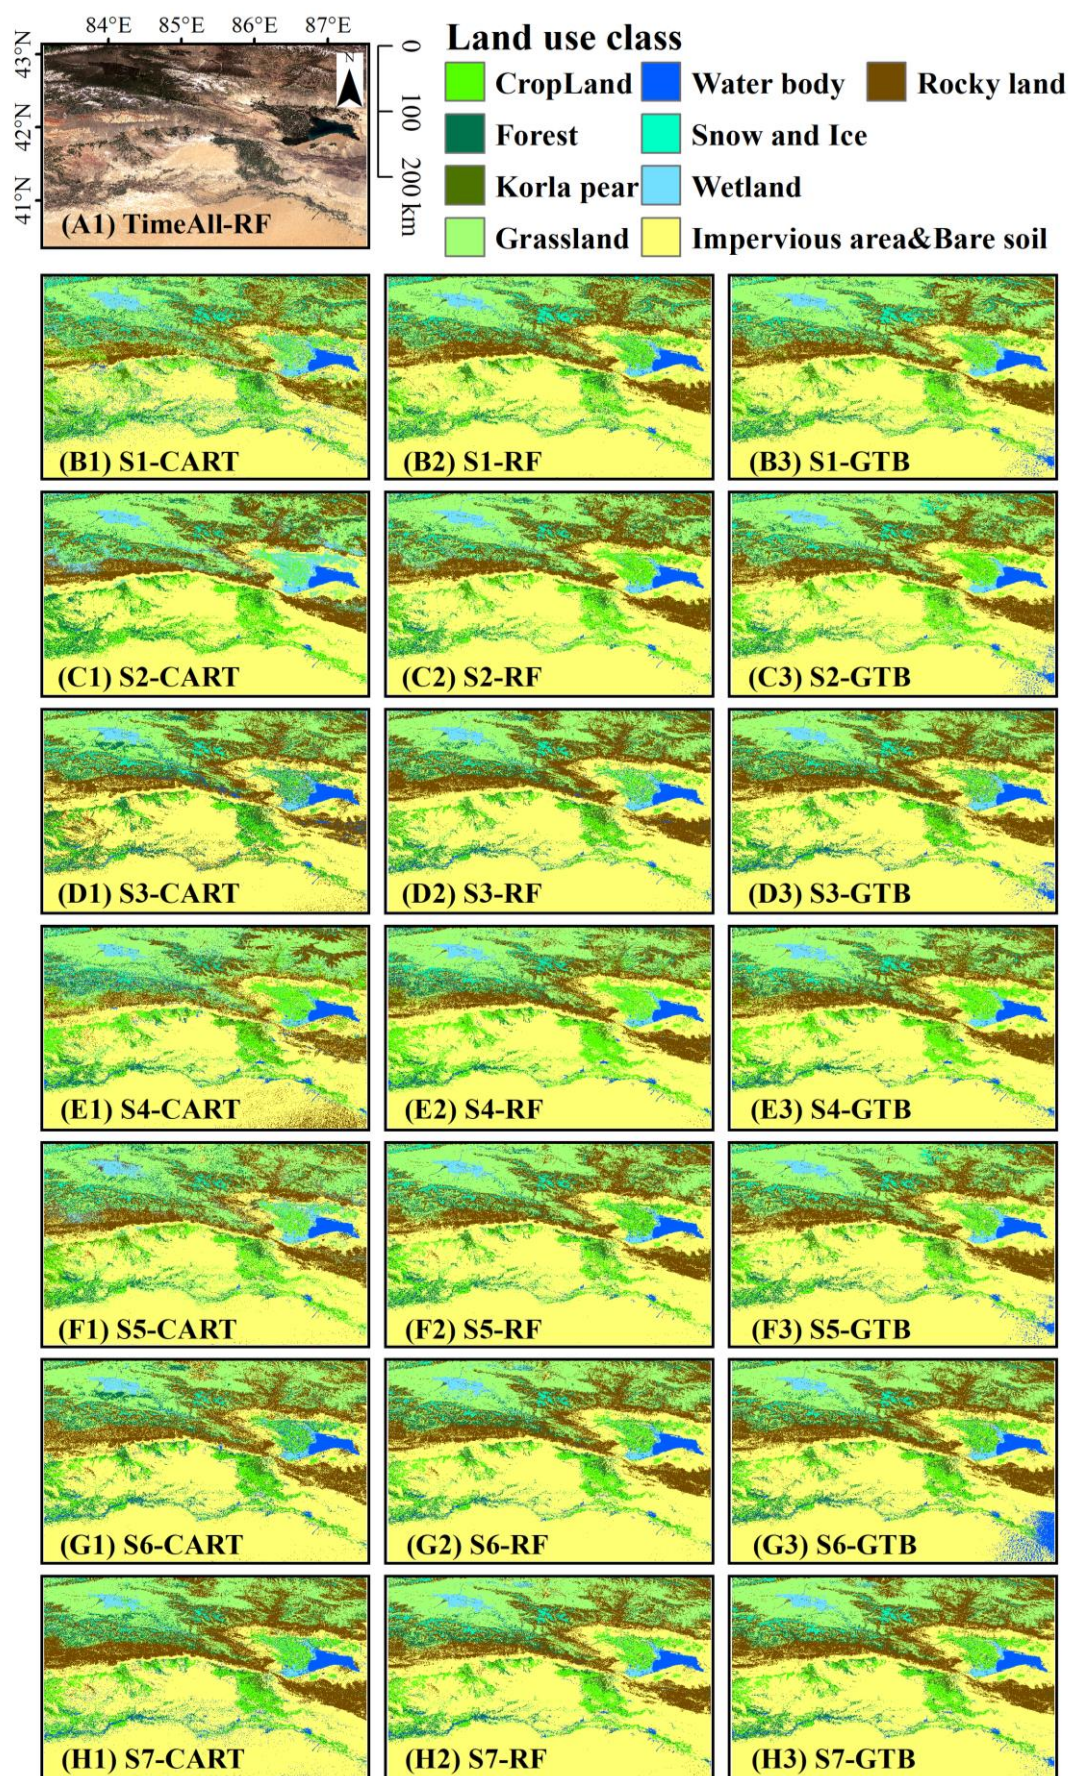

Figure S1. Mapping result for Schemes 1~7 using Classification and Regression Trees (CART), Random Forest (RF) and Gradient Tree Boost (GTB); S1: using Time1 Features, S2: using Time2 Features, S3: using Time3 Features, S4: using Time4 Features, S5: using Time1 and Time2 Features, S6: using Time1, Time2 and Time3 Features, S7: using Time1, Time2, Time3 and Time4 Features.



Table S1. Area statistics for different classes of multiple classification results.

| Algorithms | Scheme | Area of land use classification (km <sup>2</sup> ) |       |      |       |      |      |      |       |       |
|------------|--------|----------------------------------------------------|-------|------|-------|------|------|------|-------|-------|
|            |        | Cro.                                               | For.  | Kor. | Gra.  | Wat. | Sno. | Wet. | Imp.  | Roc.  |
| CART       | S1     | 10831                                              | 7340  | 2564 | 23548 | 5927 | 3889 | 4232 | 68113 | 23995 |
|            | S2     | 13095                                              | 9865  | 632  | 23241 | 1884 | 1940 | 7216 | 68406 | 24159 |
|            | S3     | 5444                                               | 12103 | 1280 | 21554 | 2872 | 2393 | 2870 | 73853 | 28071 |
|            | S4     | 12374                                              | 5247  | 2383 | 29143 | 4349 | 2668 | 2936 | 68823 | 22518 |
|            | S5     | 8740                                               | 7798  | 1852 | 29572 | 1978 | 2623 | 4955 | 68186 | 24736 |
|            | S6     | 7333                                               | 9856  | 1236 | 24565 | 2993 | 1782 | 2691 | 73194 | 26789 |
|            | S7     | 8931                                               | 7650  | 1115 | 25606 | 4277 | 2173 | 2255 | 69128 | 29305 |
| RF         | S1     | 8424                                               | 7240  | 1470 | 25680 | 2190 | 3853 | 2683 | 72465 | 26435 |
|            | S2     | 9825                                               | 6655  | 1297 | 27125 | 2161 | 2320 | 2939 | 72066 | 26052 |
|            | S3     | 6342                                               | 8621  | 1553 | 25465 | 2486 | 1802 | 2710 | 74298 | 27164 |
|            | S4     | 14044                                              | 5097  | 1008 | 25428 | 2806 | 2977 | 2737 | 72806 | 23535 |
|            | S5     | 7987                                               | 7046  | 1314 | 28179 | 2050 | 2623 | 2341 | 73864 | 25037 |
|            | S6     | 7308                                               | 7642  | 948  | 27099 | 2287 | 1998 | 2566 | 75092 | 25499 |
|            | S7     | 7820                                               | 7071  | 956  | 27545 | 2419 | 2185 | 2451 | 75856 | 24138 |
| GTB        | S1     | 8349                                               | 6823  | 1715 | 27195 | 2738 | 3711 | 2860 | 72519 | 24531 |
|            | S2     | 9706                                               | 6001  | 1470 | 26891 | 2977 | 3075 | 2451 | 72185 | 25683 |
|            | S3     | 6340                                               | 8748  | 1710 | 23440 | 3043 | 1958 | 2486 | 75041 | 27674 |
|            | S4     | 11466                                              | 4917  | 1427 | 24834 | 2708 | 3007 | 2274 | 74206 | 25600 |
|            | S5     | 7668                                               | 5881  | 1741 | 27089 | 2717 | 3114 | 2604 | 74061 | 25565 |
|            | S6     | 7174                                               | 7649  | 1263 | 25175 | 4548 | 2122 | 2317 | 73092 | 27101 |
|            | S7     | 7514                                               | 6736  | 1240 | 25166 | 2509 | 2432 | 2266 | 75585 | 26991 |

Note: Cro., For., Kor., Gra., Wat., Sno., Wet., Imp. and Roc. stand for cropland, forest, grassland, water, snow and ice, wetland, impervious area and bare soil, and rocks, respectively.

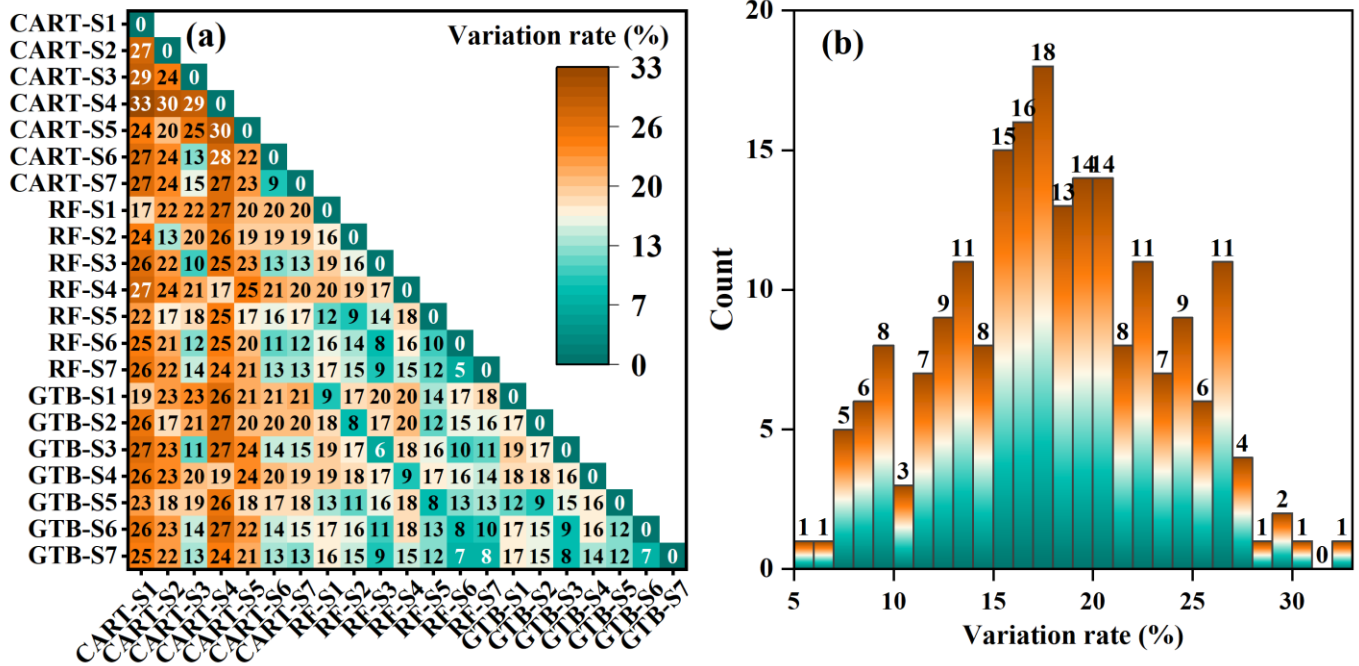

Figure S2. Rates of variation in all classes between results of multiple classifications. (a) Heat map and (b) statistical charts of difference rates. Variation rates: Ratio of different pixels in the two images to the total pixels.
